# Supplementary material for: Estimated global cost of treating COVID-19, HIV, Hepatitis B and Hepatitis C with approved effective oral medications
Source: Research Square preprint supplement (doi:10.21203/rs.3.rs-1606136/v1), 2022-04-29
Supplement: Supplementary file 1 [file 6afac9d8314f4c0e063d44b9.docx]

**Appendix 1a-1b: Nirmatrelvir flow chart showing cost estimations and bubble chart showing cost per kilogram over time throughout 2021 as reported by Panjiva**

**Appendix 1a:**


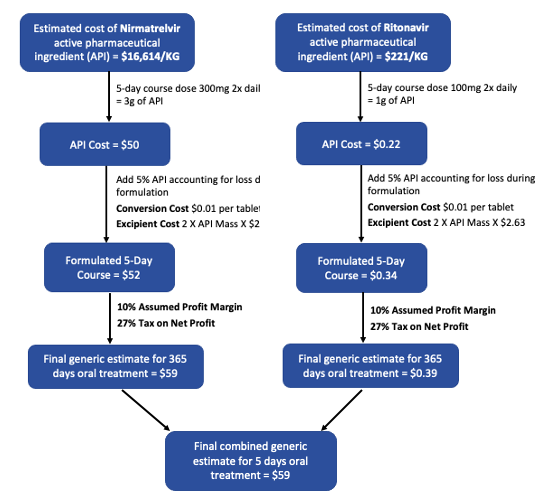


**Appendix 1b:**


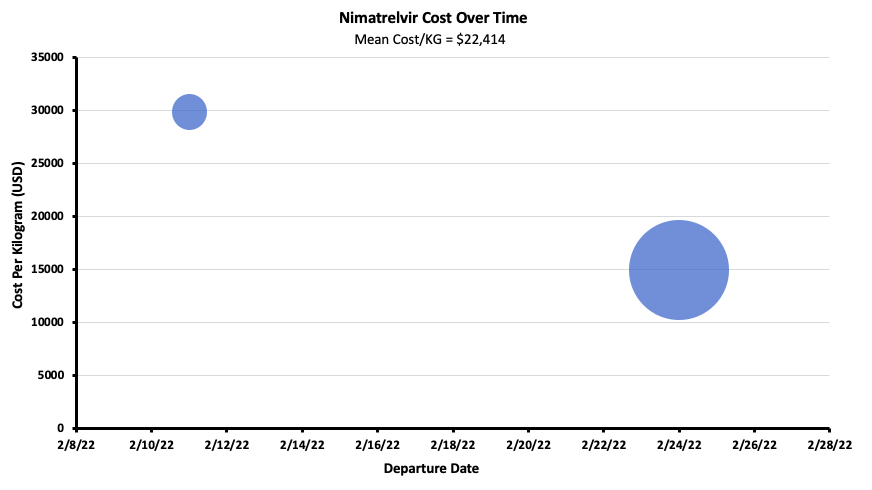


**Appendix 2a: Baracitinib flow chart showing cost estimations**

**
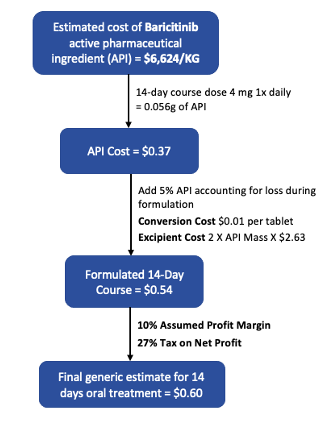
**

**Appendix 3a-3b: Dexamethasone flow chart showing cost estimations and bubble chart showing cost per kilogram over time throughout 2021 as reported by Panjiva**

**Appendix 3a:**

**
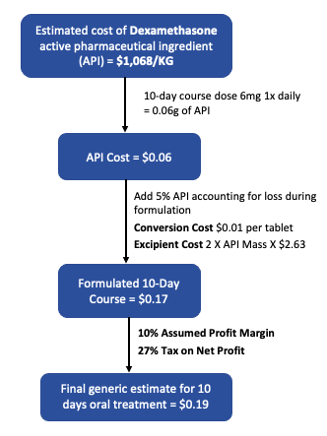
**

**Appendix 3b:**


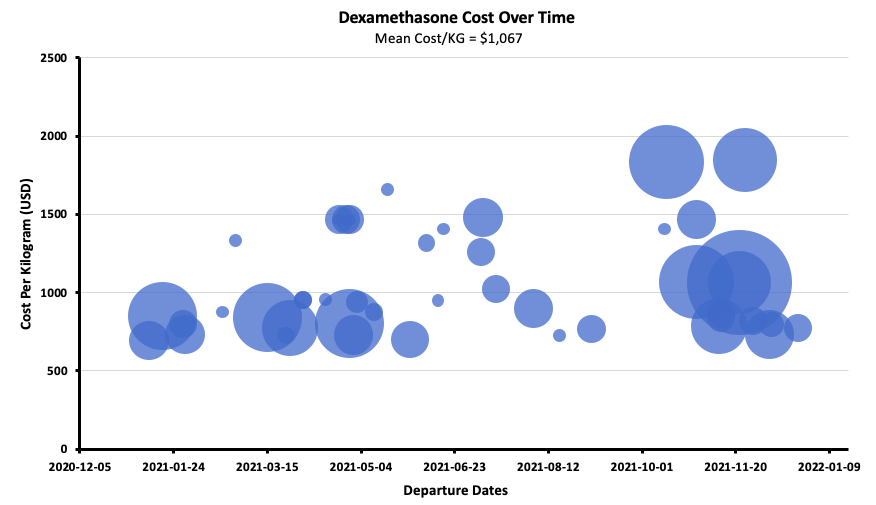


**Appendix 4a-4d: TDF/FTC/DOL flow chart showing cost estimations and bubble charts showing cost per kilogram over time throughout 2021 as reported by Panjiva**


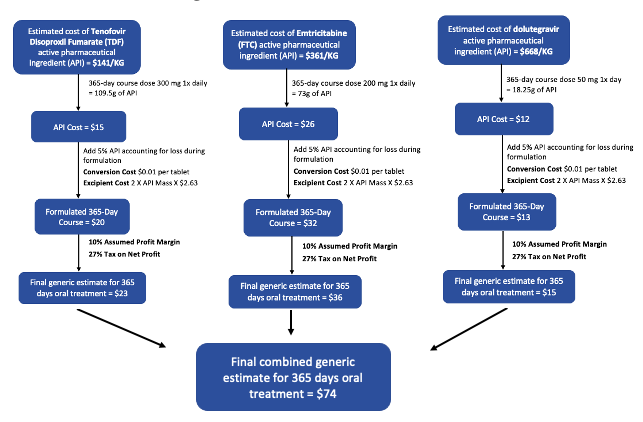
**Appendix 4a:**

**Appendix 4b:**

**
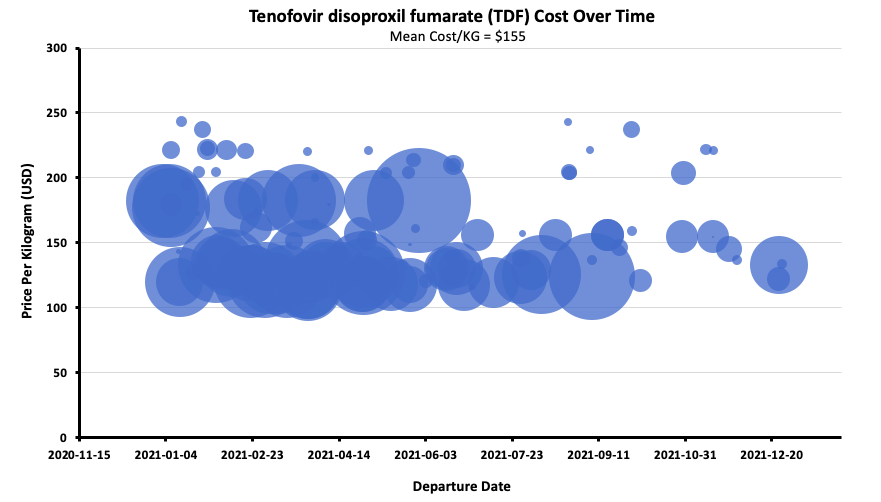
**

**Appendix 4c:**

**
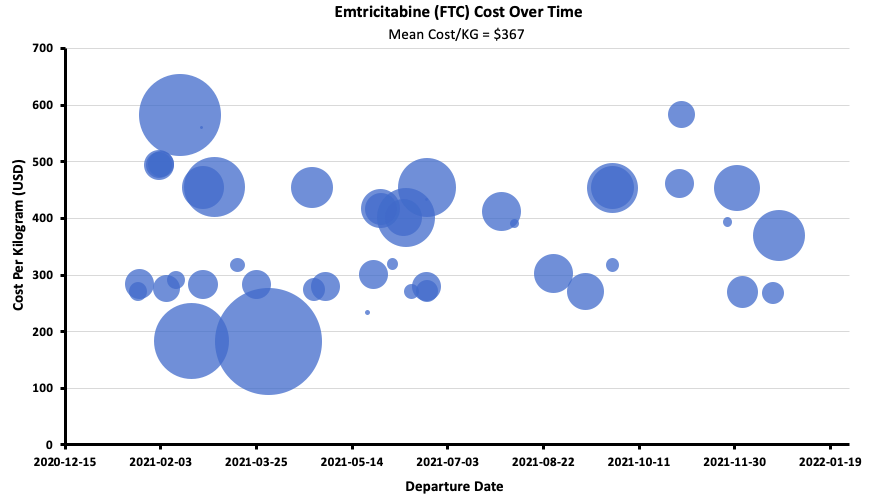
**

**Appendix 4d:**

**
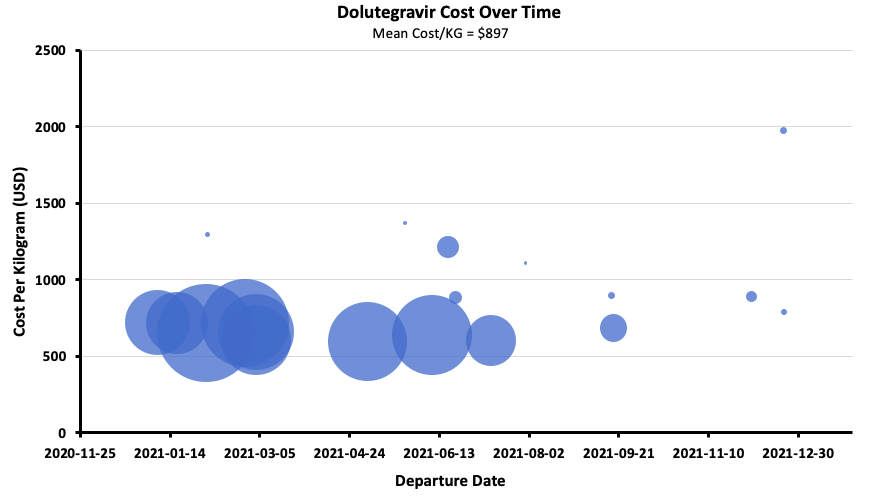
**

**Appendix 5a-5b: TAF/FTC/DOL flow chart showing cost estimations and bubble charts showing TAF cost per kilogram over time throughout 2021 as reported by Panjiva**

**
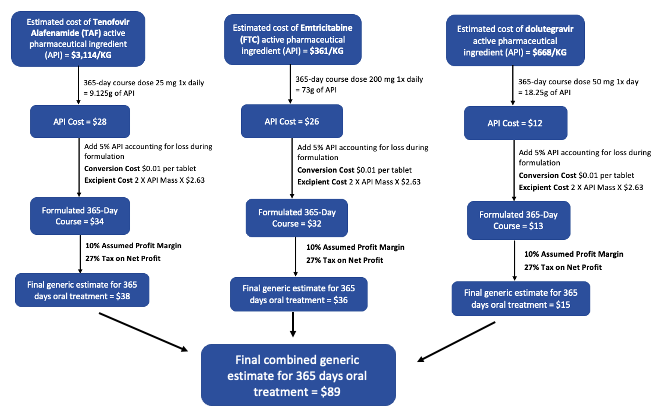
Appendix 5a:**

**Appendix 5b:**

**
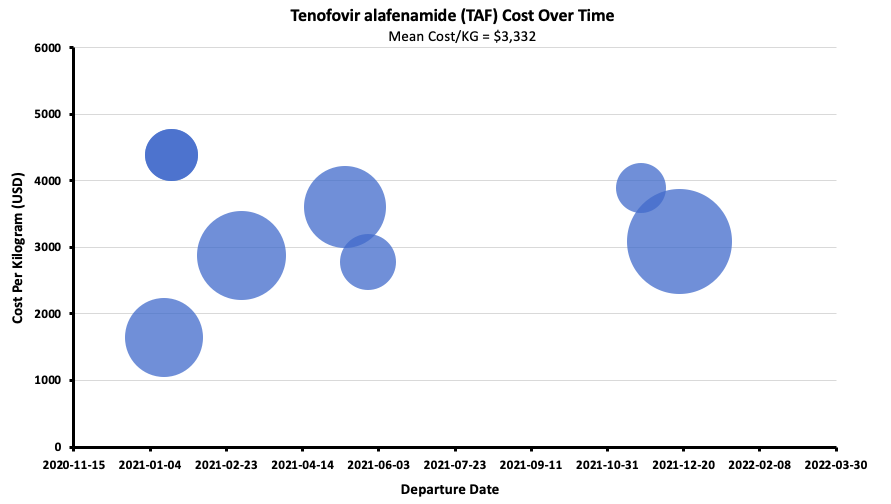
**

**Appendix 6a: TDF/FTC flow chart showing cost estimations and bubble chart showing cost per kilogram over time throughout 2021 as reported by Panjiva**

**Appendix 6a:**

**
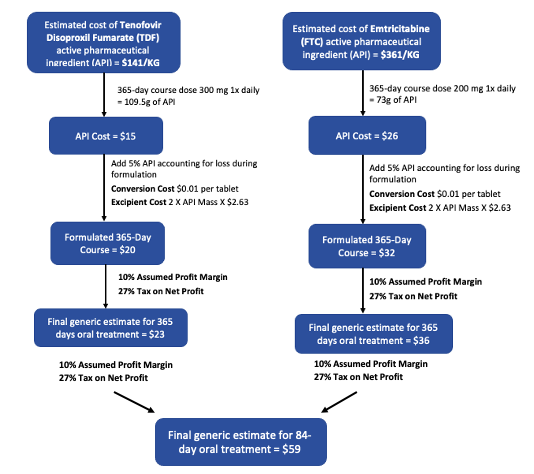
**

**Appendix 7a-7c: Darunavir and Ritonavir flow chart showing cost estimations and bubble chart showing cost per kilogram over time throughout 2021 as reported by Panjiva**

**Appendix 7a:**

**
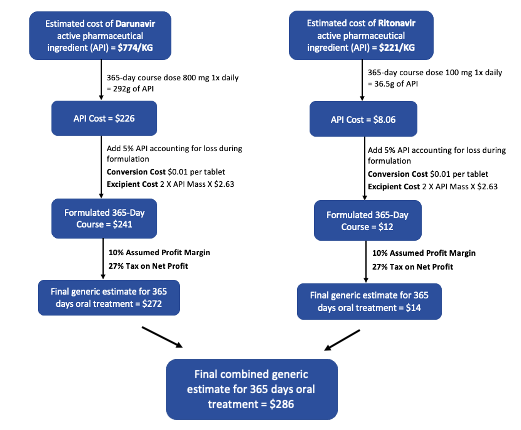
**

**Appendix 7b:**


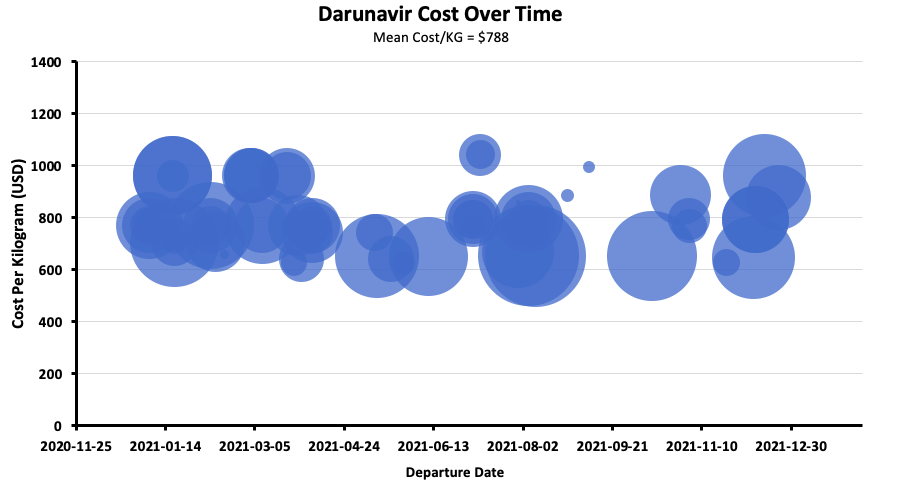


**Appendix 7c:**

**
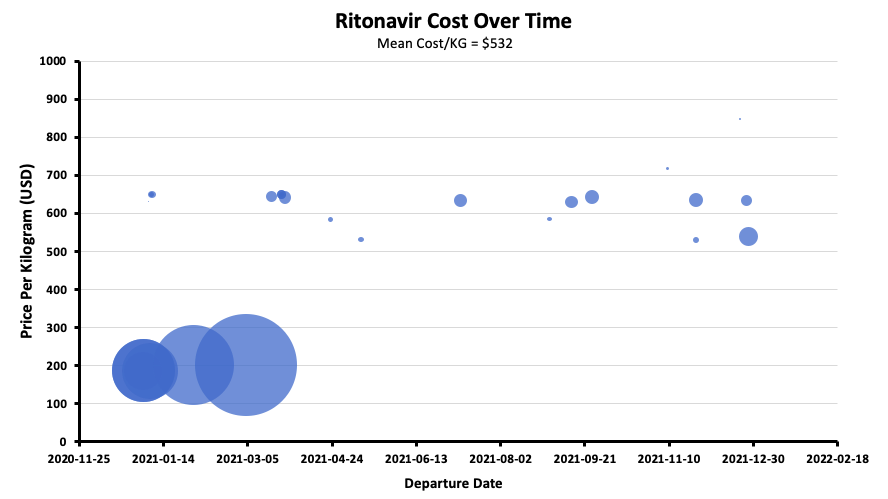
**

**Appendix 8a-8b: Atazanavir and Darunavir flow chart showing cost estimations and Atazanavir bubble chart showing cost per kilogram over time throughout 2021 as reported by Panjiva**

**Appendix 8a:**

**
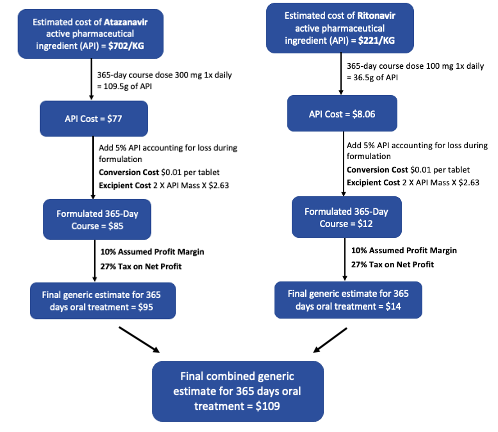
**

**Appendix 8b:**

**
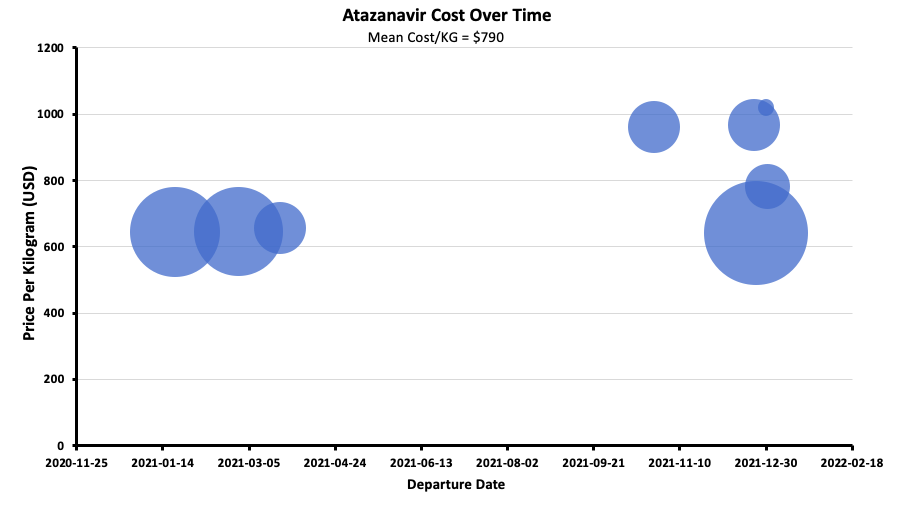
**

**Appendix 9a-9b: SOF/DAC flow chart showing cost estimations and bubble charts showing SOF cost per kilogram over time throughout 2021 as reported by Panjiva**

**Appendix 9a:**

**
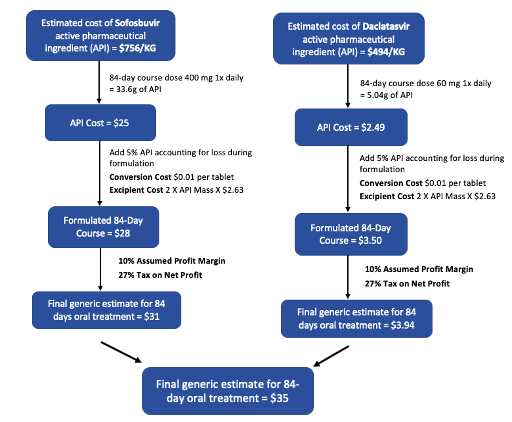
**

**Appendix 9b**

**
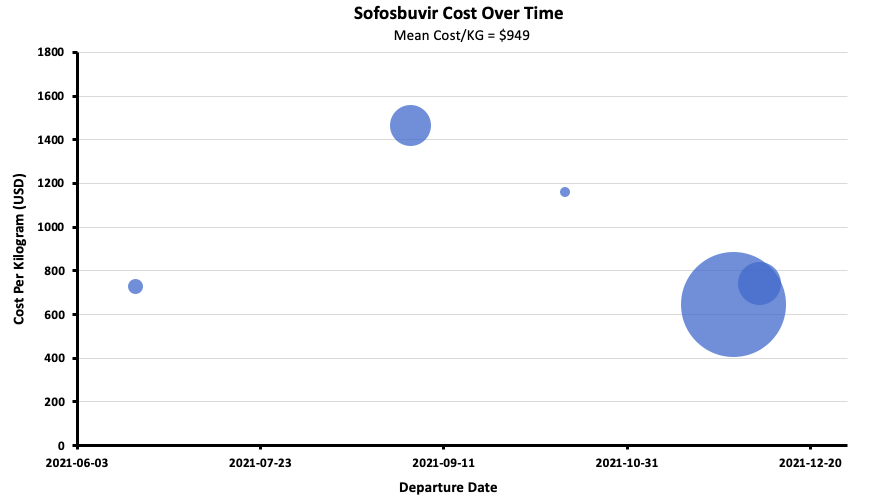
**

**Appendix 10a-10b: SOF/VEL flow chart showing cost estimations and bubble charts showing VEL cost per kilogram over time throughout 2021 as reported by Panjiva**

**Appendix 10a:**


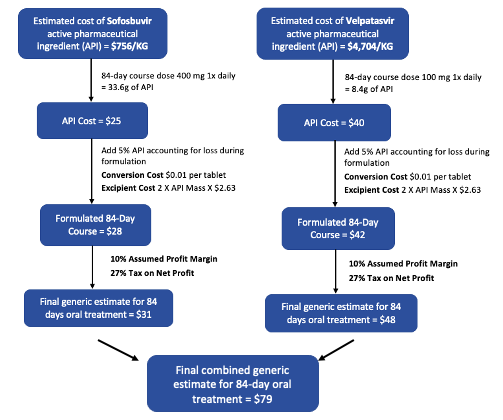


**Appendix 10b:**

**
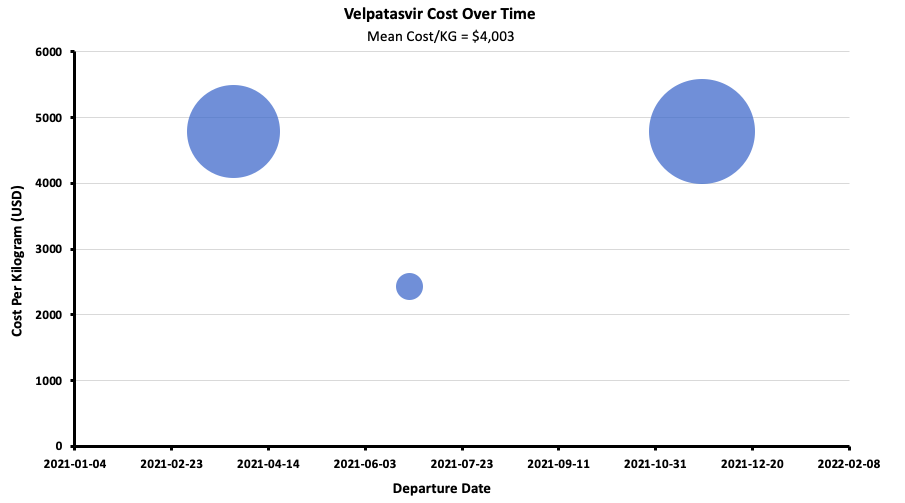
**

**Supplementary Data:**

Appendix 1a-1b: Nirmatrelvir flow chart showing cost estimations and bubble chart showing cost per kilogram over time throughout 2021 as reported by Panjiva

Appendix 2a: Baracitinib flow chart showing cost estimations

Appendix 3a-3b: Dexamethasone flow chart showing cost estimations and bubble chart showing cost per kilogram over time throughout 2021 as reported by Panjiva

Appendix 4a-4d: TDF/FTC/DOL flow chart showing cost estimations and bubble charts showing cost per kilogram over time throughout 2021 as reported by Panjiva

Appendix 5a-5b: TAF/FTC/DOL flow chart showing cost estimations and bubble charts showing TAF cost per kilogram over time throughout 2021 as reported by Panjiva

Appendix 6a: TDF/FTC flow chart showing cost estimations and bubble chart showing cost per kilogram over time throughout 2021 as reported by Panjiva

Appendix 7a-7c: Darunavir and Ritonavir flow chart showing cost estimations and bubble chart showing cost per kilogram over time throughout 2021 as reported by Panjiva

Appendix 8a-8b: Atazanavir and Darunavir flow chart showing cost estimations and Atazanavir bubble chart showing cost per kilogram over time throughout 2021 as reported by Panjiva

Appendix 9a-9b: SOF/DAC flow chart showing cost estimations and bubble charts showing SOF cost per kilogram over time throughout 2021 as reported by Panjiva

Appendix 10a-10b: SOF/VEL flow chart showing cost estimations and bubble charts showing VEL cost per kilogram over time throughout 2021 as reported by Panjiva

**Appendix 1 – List of drug pricing sources**

Bangladesh – https://medex.com.bd/brands/

France – http://base-donnees-publique.medicaments.gouv.fr/

India – https://www.1mg.com/drugs/

Kenya – https://www.pharmafinder.co.ke

Turkey – https://ilacabak.com/

United Kingdom – https://bnf.nice.org.uk/medicinal-forms/

USA (Pharm) – https://www.drugs.com/price-guide/

USA (Veterans) – https://www.vendorportal.ecms.va.gov/NAC/Pharma/

Vietnam- https://drugbank.vn/thuoc/

**Appendix 2 – Drug pricing sources for molnupiravir**

USA - https://www.openaccessgovernment.org/merck-covid-pill-2/121962/

Thailand - https://www.bangkokpost.com/thailand/general/2212563/cabinet-approves-purchase-of-molnupiravir

Bangladesh - https://www.reuters.com/business/healthcare-pharmaceuticals/asian-firm-beximco-sell-generic-version-merck-covid-19-pill-2021-11-09/

Japan - https://www.japantimes.co.jp/news/2021/11/10/national/science-health/japan-covid-pill/

Philippines - https://www.reuters.com/world/asia-pacific/philippines-receive-300000-courses-mercks-covid-19-pill-2021-10-27/

India - https://www.ndtv.com/india-news/game-changing-made-in-india-anti-covid-pills-could-be-cleared-for-use-in-days-2606341
